# Supplementary material for: Control of Jasmonate Biosynthesis and Senescence by miR319 Targets
Source: PLOS journal article supplement (doi:10.1371/journal.pbio.0060230), 2008-09-19
Supplement: S1 (10.1371/journal.pbio.0060230.s001) [file journal.pbio.0060230.s001]

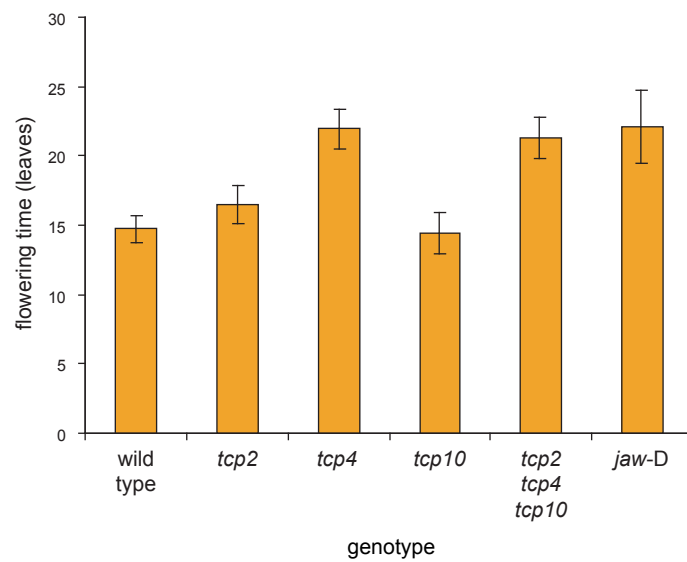

**Figure S1.** Flowering time of different genotypes in long days.

Wild type was Columbia (Col-0).
