# Supplementary material for: Control of Jasmonate Biosynthesis and Senescence by miR319 Targets
Source: PLOS journal article supplement (doi:10.1371/journal.pbio.0060230), 2008-09-19
Supplement: S7 (10.1371/journal.pbio.0060230.s007) [file journal.pbio.0060230.s007]

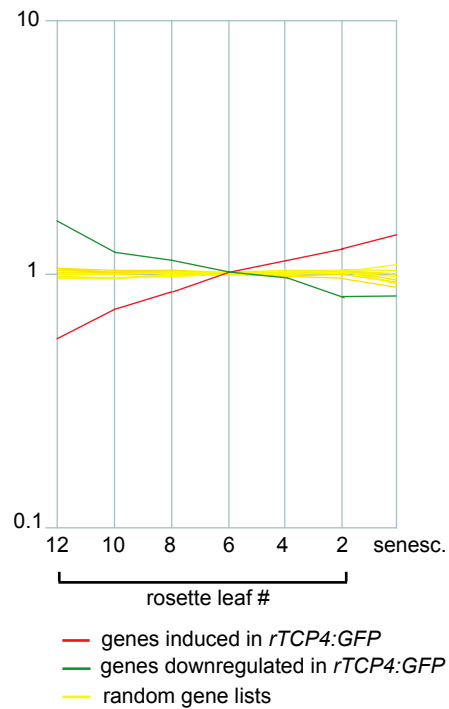

**Figure S7.** Wild-type expression profiles of genes differentially expressed in *rTCP4:GFP* plants.

Genes were selected based on logit-T per-gene variance  $p < 0.05$ , common variance  $> 2$  fold. Average normalized expression levels in green rosette leaves of wild type, with 12 being the youngest and 2 the oldest, and senescing leaves (senesc.). Ten random gene lists containing 880 genes each were included for comparison. Data are from Schmid M, Davison TS, Henz SR, Pape UJ, Demar M et al. (2005) A gene expression map of *Arabidopsis thaliana* development. Nat Genet 37(5): 501-506.
