# Supplementary material for: Control of Jasmonate Biosynthesis and Senescence by miR319 Targets
Source: PLOS journal article supplement (doi:10.1371/journal.pbio.0060230), 2008-09-19
Supplement: S8 (10.1371/journal.pbio.0060230.s008) [file journal.pbio.0060230.s008]

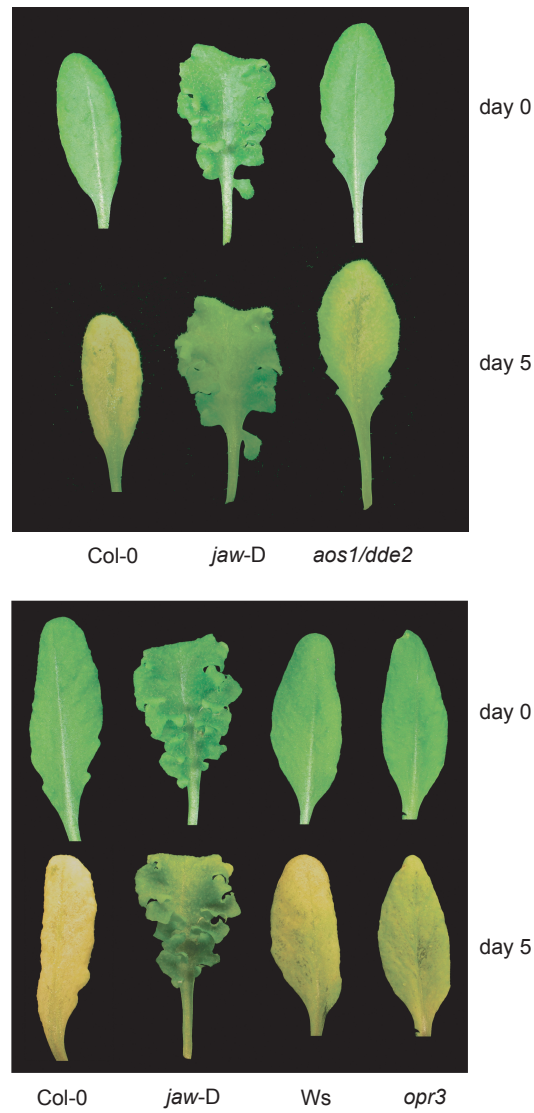

**Figure S8.** Senescence assay with JA biosynthesis mutants.

Comparison of senescence induced in detached leaves floated on water in the dark. *aos1* (*dde2*) and *jaw-D* are the in Col-0 background, *opr3* in the *Ws* background.
