# Supplementary material for: Control of Jasmonate Biosynthesis and Senescence by miR319 Targets
Source: PLoS Biol. 2008 Sep 23;6(9):e230. doi: 10.1371/journal.pbio.0060230 (PMC2553836; doi:10.1371/journal.pbio.0060230)
Supplement: Table S1 — (126 KB PDF) [file pbio.0060230.st001.pdf]

**Table S1.** Genes significantly changing in at least two of three conditions: downregulated in *jaw*-D leaves or apices, upregulated in *rTCP4:GFP* plants (logit-T  $p < 0.05$  and common variance  $> 2$  fold). Promoters were arbitrarily defined as  $-800$  to  $-10$  bp from ATG.

| Gene ID   | Description                                          | fold<br>reduced<br><i>jaw</i> -D<br>apex | fold<br>reduced<br><i>jaw</i> -D<br>leaves | fold<br>induced<br><i>rTCP4</i> :<br><i>GFP</i><br>apex | Overrepresented motif |        |        |        |             |
|-----------|------------------------------------------------------|------------------------------------------|--------------------------------------------|---------------------------------------------------------|-----------------------|--------|--------|--------|-------------|
|           |                                                      |                                          |                                            |                                                         | GGACCA                | TGGTCC | AGGACC | GGACCC | AGGA<br>CCC |
| At1g03400 | 2-oxoglutarate-dependent dioxygenase, putative       | 2.5                                      | 2.0                                        | 2.1                                                     |                       |        |        | +      |             |
| At1g03850 | glutaredoxin family protein                          | 0.7                                      | 5.9                                        | 15.5                                                    |                       | +      |        |        |             |
| At1g07000 | exocyst subunit EXO70 family protein                 | 1.3                                      | 2.2                                        | 4.3                                                     |                       |        |        |        |             |
| At1g07440 | tropinone reductase, putative                        | 1.9                                      | 1.4                                        | 2.6                                                     |                       |        |        | +      |             |
| At1g09070 | C2 domain-containing protein                         | 1.4                                      | 2.4                                        | 4.5                                                     |                       |        |        |        |             |
| At1g10340 | ankyrin repeat family protein                        | 1.0                                      | 4.2                                        | 29.8                                                    |                       |        |        |        |             |
| At1g13470 | expressed protein                                    | 2.2                                      | 6.8                                        | 7.7                                                     | +                     |        |        |        |             |
| At1g19180 | expressed protein                                    | 4.8                                      | 2.2                                        | 13.8                                                    |                       |        |        |        |             |
| At1g19670 | coronatine-responsive protein (CORI1)                | 3.4                                      | 1.3                                        | 2.7                                                     |                       |        |        |        |             |
| At1g22690 | gibberellin-responsive protein, putative             | 2.0                                      | 0.7                                        | 3.1                                                     |                       |        |        |        |             |
| At1g23130 | Bet v I allergen family protein                      | 13.0                                     | 2.2                                        | 34.3                                                    | +                     |        |        |        |             |
| At1g25560 | AP2 domain-containing transcription factor, putative | 1.2                                      | 2.8                                        | 5.3                                                     | +                     |        |        |        |             |
| At1g28600 | lipase, putative                                     | 4.3                                      | 1.7                                        | 4.3                                                     | +                     |        |        |        |             |
| At1g30210 | TCP family transcription factor, putative            | 6.1                                      | 6.6                                        | 0.8                                                     |                       |        |        |        |             |
| At1g31680 | copper amine oxidase family protein                  | 11.5                                     | 8.7                                        | 1.7                                                     | +                     |        | +      | +      | +           |

|           |                                                         |      |      |      |   |   |   |   |
|-----------|---------------------------------------------------------|------|------|------|---|---|---|---|
| At1g31690 | copper amine oxidase, putative                          | 17.4 | 15.2 | 2.5  |   |   |   |   |
| At1g35710 | leucine-rich repeat transmembrane prot. kin., putative  | 2.7  | 2.9  | 16.1 |   |   |   |   |
| At1g52800 | oxidoreductase, 2OG-Fe(II) oxygenase family protein     | 1.3  | 4.1  | 13.3 | + |   |   |   |
| At1g53230 | TCP family transcription factor 3 (TCP3)                | 10.8 | 8.6  | 0.6  |   |   |   |   |
| At1g53885 | senescence-associated protein-related                   | 3.0  | 3.0  | 1.8  |   |   |   |   |
| At1g54040 | kelch repeat-containing protein                         | 10.7 | 5.3  | 1.6  | + |   | + |   |
| At1g65490 | expressed protein                                       | 3.8  | 1.8  | 17.3 |   |   |   |   |
| At1g69870 | proton-dep. oligopeptide transport (POT) family protein | 2.3  | 1.6  | 39.5 |   |   |   |   |
| At1g70810 | C2 domain-containing protein                            | 2.5  | 1.3  | 9.7  |   | + |   |   |
| At1g80130 | expressed protein                                       | 1.3  | 2.3  | 13.2 | + |   | + |   |
| At2g04160 | subtilisin-like protease (AIR3)                         | 7.7  | 2.3  | 11.3 | + |   | + |   |
| At2g14560 | expressed protein                                       | 9.9  | 22.8 | 2.3  |   |   |   |   |
| At2g17040 | no apical meristem (NAM) family protein                 | 1.5  | 2.9  | 34.2 |   | + |   |   |
| At2g19310 | expressed protein                                       | 2.4  | 1.2  | 3.4  |   |   |   |   |
| At2g20570 | golden2-like transcription factor (GLK1)                | 2.0  | 1.3  | 2.9  |   |   | + | + |
| At2g25510 | expressed protein                                       | 2.4  | 1.3  | 2.1  |   |   |   |   |
| At2g26440 | pectinesterase family protein                           | 1.5  | 4.4  | 6.1  | + |   | + |   |
| At2g29290 | tropinone reductase, putative                           | 9.5  | 4.8  | 1.6  | + |   | + |   |
| At2g31070 | TCP family transcription factor, putative               | 2.8  | 3.7  | 0.4  |   |   |   |   |
| At2g32160 | expressed protein                                       | 6.1  | 7.9  | 3.6  |   |   |   |   |
| At2g33530 | serine carboxypeptidase S10 family protein              | 1.9  | 3.4  | 3.2  | + |   | + |   |

|           |                                                      |      |      |       |   |   |  |   |   |
|-----------|------------------------------------------------------|------|------|-------|---|---|--|---|---|
| At2g33810 | squamosa promoter-binding protein-like 3 (SPL3)      | 10.2 | 1.5  | 23.6  |   | + |  |   |   |
| At2g37540 | short-chain dehydrogen./reductase (SDR) family prot. | 2.3  | 1.7  | 6.0   | + |   |  |   |   |
| At2g39980 | transferase family protein                           | 1.6  | 4.1  | 4.5   |   | + |  |   |   |
| At2g40100 | chlorophyll A-B binding protein (LHCB4.3)            | 3.4  | 2.5  | 0.6   | + |   |  |   |   |
| At2g40670 | two-component responsive regulator (ARR16)           | 7.2  | 2.3  | 4.1   |   | + |  |   |   |
| At2g41090 | calmodulin-like calcium-binding protein              | 2.9  | 2.3  | 2.3   |   | + |  |   |   |
| At2g43590 | chitinase, putative                                  | 5.7  | 0.3  | 136.9 |   |   |  |   | + |
| At2g47130 | short-chain dehydrogen./reductase (SDR) family prot. | 1.2  | 4.0  | 5.3   |   |   |  |   |   |
| At3g01960 | expressed protein                                    | 3.0  | 3.2  | 3.5   | + |   |  | + |   |
| At3g04210 | disease resistance protein (TIR-NBS class), putative | 1.8  | 2.3  | 2.0   |   |   |  |   |   |
| At3g05660 | disease resistance family protein                    | 1.1  | 2.8  | 10.1  | + |   |  |   |   |
| At3g05730 | expressed protein                                    | 5.7  | 13.1 | 10.1  |   |   |  |   |   |
| At3g10720 | pectinesterase, putative                             | 1.9  | 1.4  | 2.8   |   | + |  |   |   |
| At3g11840 | U-box domain-containing protein                      | 1.4  | 2.5  | 7.6   |   |   |  |   |   |
| At3g11930 | universal stress protein (USP) family protein        | 3.7  | 0.8  | 9.4   |   |   |  |   |   |
| At3g14620 | cytochrome P450, putative                            | 1.1  | 2.3  | 22.1  |   |   |  |   |   |
| At3g15030 | TCP family transcription factor, putative            | 8.6  | 22.5 | 5.6   |   |   |  |   |   |
| At3g16660 | expressed protein                                    | 2.4  | 1.6  | 19.9  |   |   |  | + | + |
| At3g16670 | expressed protein                                    | 22.7 | 10.2 | 35.6  |   |   |  |   | + |
| At3g19030 | expressed protein                                    | 2.0  | 2.5  | 12.9  |   |   |  |   |   |
| At3g22231 | expressed protein                                    | 2.7  | 9.4  | 1.4   |   |   |  |   |   |

|           |                                                       |      |      |      |   |   |   |   |
|-----------|-------------------------------------------------------|------|------|------|---|---|---|---|
| At3g22240 | expressed protein                                     | 2.7  | 4.8  | 1.5  | + |   |   |   |
| At3g23030 | auxin-responsive protein (IAA2)                       | 0.8  | 2.7  | 4.2  |   |   |   |   |
| At3g26230 | cytochrome P450 family protein                        | 2.5  | 1.5  | 5.9  |   |   |   |   |
| At3g28220 | meprin and TRAF homology domain-containing protein    | 3.2  | 0.9  | 12.3 |   |   |   |   |
| At3g28540 | AAA-type ATPase family protein                        | 1.0  | 5.4  | 26.4 |   |   |   |   |
| At3g45140 | lipoxygenase (LOX2)                                   | 38.6 | 2.2  | 4.5  | + | + | + |   |
| At3g48720 | transferase family protein                            | 2.6  | 1.6  | 5.1  |   | + |   | + |
| At3g50260 | AP2 domain-containing transcription factor, putative  | 1.0  | 3.6  | 5.2  |   |   |   |   |
| At3g50480 | broad-spectrum mildew resistance RPW8 family prot.    | 2.2  | 2.4  | 11.9 |   |   |   |   |
| At3g51660 | macrophage migration inhibitory factor family protein | 3.0  | 5.2  | 5.0  |   | + |   |   |
| At3g52340 | sucrose-phosphatase 2 (SPP2)                          | 2.0  | 1.2  | 10.1 |   | + |   |   |
| At3g55980 | zinc finger (CCCH-type) family protein                | 0.9  | 2.5  | 9.7  |   |   |   |   |
| At3g56400 | WRKY family transcription factor                      | 1.8  | 4.8  | 2.6  |   |   | + | + |
| At3g60420 | expressed protein                                     | 7.1  | 15.4 | 17.9 | + | + | + |   |
| At3g62550 | universal stress protein (USP) family protein         | 2.1  | 2.1  | 3.4  | + |   |   |   |
| At4g14400 | ankyrin repeat family protein                         | 12.3 | 2.6  | 2.1  |   |   |   |   |
| At4g15440 | hydroperoxide lyase (HPL1)                            | 4.7  | 1.8  | 4.2  | + |   | + | + |
| At4g15660 | glutaredoxin family protein                           | 3.9  | 2.0  | 14.4 |   |   | + | + |
| At4g15680 | glutaredoxin family protein                           | 3.1  | 2.1  | 5.2  |   |   | + | + |
| At4g15690 | glutaredoxin family protein                           | 3.5  | 3.2  | 6.1  |   |   | + | + |
| At4g15700 | glutaredoxin family protein                           | 2.6  | 2.5  | 4.7  |   |   | + |   |
| At4g16760 | acyl-CoA oxidase (ACX1)                               | 7.9  | 9.2  | 1.6  |   |   |   |   |

|           |                                                     |      |      |       |   |   |   |   |   |
|-----------|-----------------------------------------------------|------|------|-------|---|---|---|---|---|
| At4g17810 | zinc finger (C2H2 type) family protein              | 2.2  | 2.5  | 1.4   |   |   |   |   |   |
| At4g18390 | TCP family transcription factor, putative           | 9.2  | 13.0 | 0.6   |   |   |   |   |   |
| At4g19960 | potassium transporter family protein                | 2.7  | 1.3  | 6.6   |   |   |   |   |   |
| At4g22200 | potassium channel protein 2 (AKT2) (AKT3)           | 2.4  | 1.2  | 3.0   | + | + | + | + |   |
| At4g23290 | protein kinase family protein                       | 6.8  | 3.5  | 47.4  | + | + |   |   |   |
| At4g23300 | protein kinase family protein                       | 6.2  | 6.6  | 126.1 | + | + | + | + | + |
| At4g32280 | auxin-responsive AUX/IAA family protein             | 1.6  | 6.2  | 24.8  |   |   |   |   |   |
| At4g37980 | mannitol dehydrogenase, putative (ELI3-1)           | 27.1 | 65.8 | 17.9  | + | + |   |   |   |
| At4g38950 | kinesin motor family protein                        | 3.4  | 3.4  | 2.1   | + |   |   |   |   |
| At4g39800 | inositol-3-phosphate synthase isozyme (IPS 1)       | 2.8  | 1.8  | 2.9   | + |   | + | + | + |
| At5g02760 | protein phosphatase 2C family protein               | 3.9  | 10.7 | 33.1  |   | + |   |   |   |
| At5g05600 | oxidoreductase, 2OG-Fe(II) oxygenase family protein | 2.3  | 1.3  | 32.0  |   |   |   |   |   |
| At5g07240 | calmodulin-binding family protein                   | 2.7  | 2.8  | 1.7   |   | + |   |   |   |
| At5g08240 | expressed protein                                   | 0.8  | 2.6  | 7.5   | + |   |   |   |   |
| At5g10380 | zinc finger (C3HC4-type RING finger) family protein | 1.2  | 2.8  | 89.6  |   |   | + | + | + |
| At5g12050 | expressed protein                                   | 1.1  | 4.7  | 11.2  |   | + |   |   |   |
| At5g18600 | glutaredoxin family protein                         | 8.5  | 1.6  | 8.8   |   |   |   |   |   |
| At5g24210 | lipase class 3 family protein                       | 3.0  | 3.1  | 14.6  |   |   |   |   |   |
| At5g24530 | oxidoreductase, 2OG-Fe(II) oxygenase family protein | 2.8  | 3.4  | 5.9   |   |   | + |   |   |
| At5g35490 | expressed protein (MRU1)                            | 3.9  | 1.2  | 4.6   |   |   |   |   |   |
| At5g36220 | cytochrome P450 81D1 (CYP81D1) (CYP91A1)            | 3.6  | 1.0  | 14.2  |   |   | + |   |   |
| At5g41410 | homeodomain protein (BEL1)                          | 2.7  | 1.9  | 6.1   |   |   |   |   |   |
| At5g44260 | zinc finger (CCCH-type) family protein              | 2.2  | 3.8  | 9.3   |   |   |   |   |   |

|           |                                                        |      |     |      |   |   |   |   |
|-----------|--------------------------------------------------------|------|-----|------|---|---|---|---|
| At5g44420 | plant defensin protein, putative (PDF1.2a)             | 2.6  | 5.0 | 12.1 |   |   |   |   |
| At5g44810 | putative protein                                       | 1.7  | 2.5 | 3.3  |   |   |   |   |
| At5g46230 | expressed protein                                      | 1.5  | 2.3 | 6.4  |   |   |   |   |
| At5g47220 | ethylene-responsive element-binding factor 2 (ERF2)    | 2.3  | 1.5 | 6.2  |   |   |   |   |
| At5g47370 | homeobox-leucine zipper protein 2 (HAT2)               | 0.6  | 5.2 | 3.5  |   | + |   |   |
| At5g50160 | ferric reductase-like transmem. component family prot. | 2.2  | 1.1 | 3.2  | + |   |   |   |
| At5g51390 | expressed protein                                      | 2.0  | 2.7 | 3.4  |   |   |   |   |
| At5g52750 | heavy-metal-associated domain-containing protein       | 1.0  | 2.2 | 15.1 |   |   |   |   |
| At5g52900 | expressed protein                                      | 1.4  | 5.8 | 2.4  |   | + |   |   |
| At5g54610 | ankyrin repeat family protein                          | 2.5  | 5.5 | 2.9  |   | + | + | + |
| At5g57760 | expressed protein                                      | 10.3 | 3.3 | 9.2  | + |   | + |   |
| At5g59670 | leucine-rich repeat protein kinase, putative           | 3.8  | 3.7 | 0.8  |   | + |   |   |
| At5g60900 | lectin protein kinase family protein                   | 2.4  | 3.4 | 7.2  |   | + |   |   |
| At5g60910 | FRUITFULL (AGL8)                                       | 2.5  | 1.9 | 65.9 |   |   |   |   |
| At5g67370 | expressed protein                                      | 2.2  | 1.3 | 3.9  |   |   |   |   |
